# Supplementary material for: The first alternating MnII–MnIII1D chain: structure, magnetic properties and catalytic oxidase activities
Source: Royal Society of Chemistry journal article supplement (doi:10.1039/c8nj00414e), 2018-01-01
Supplement: c8nj00414e1.pdf [file c8nj00414e1.pdf]

## The First Alternating Mn<sup>II</sup>-Mn<sup>III</sup> 1D Chain: Structure, Magnetic Properties and Catalytic Oxidase Activities

Sayantana Ganguly,<sup>a,b</sup> Paramita Kar,<sup>a,c</sup> Maharudra Chakraborty,<sup>a</sup> Ashutosh Ghosh<sup>a\*</sup>

<sup>a</sup>Department of Chemistry, University College of Science, University of Calcutta, 92, A. P. C. Road, Kolkata-700 009, India; e-mail: ghosh\_59@yahoo.com

<sup>b</sup>Department of Chemistry, Taki Government College, Taki, Hasnabad, West Bengal 743429, India

<sup>c</sup>Department of Chemistry, Bagnan College, Bagnan, Howrah, West Bengal 711303, India

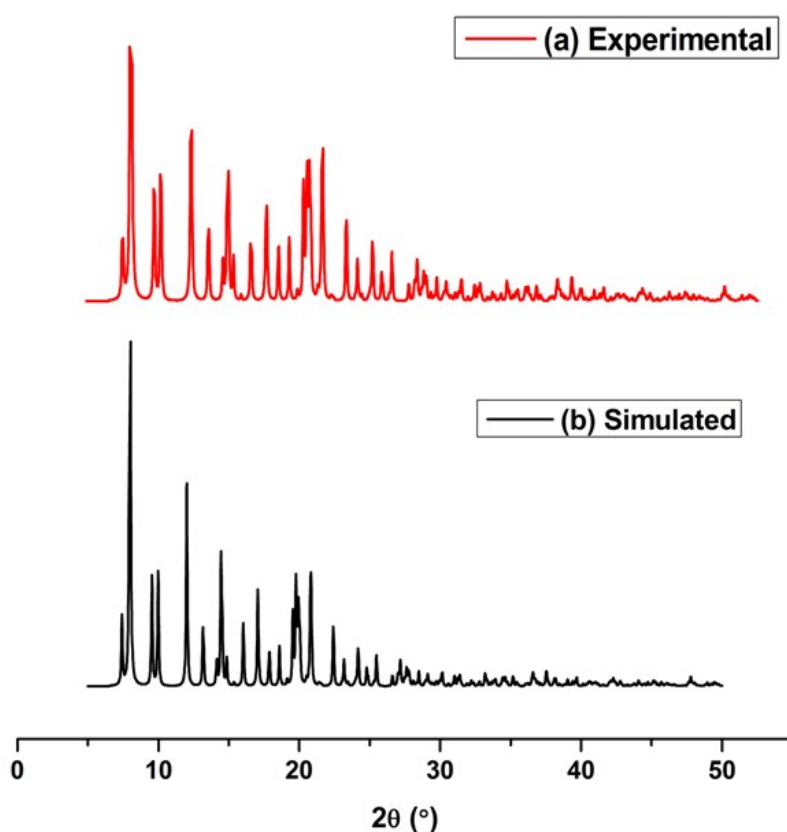

**Fig. S1** Powder X-ray Diffraction Patterns of complex **1** (a) experimental ( $\lambda = 0.15418$  nm) (b) simulated (calculated from the crystal structure of complex **1**)

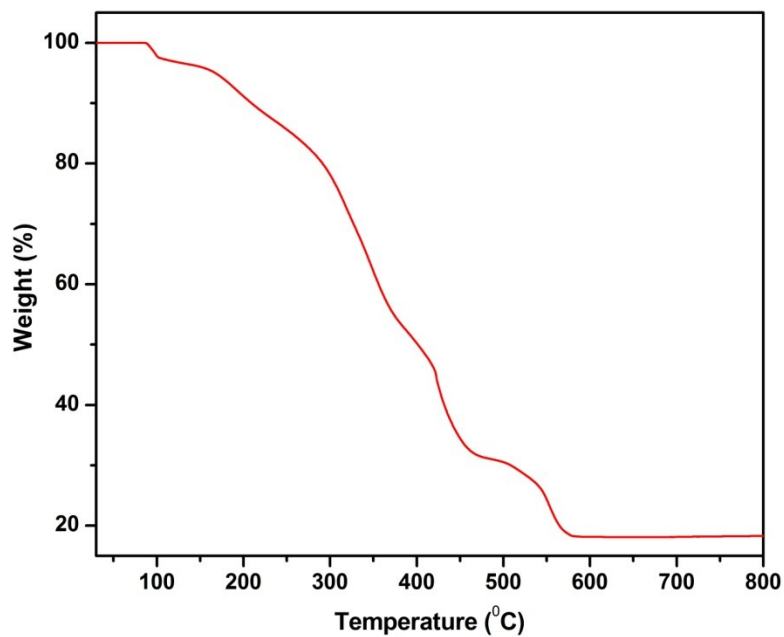

Fig. S2 Thermogram of complex 1.

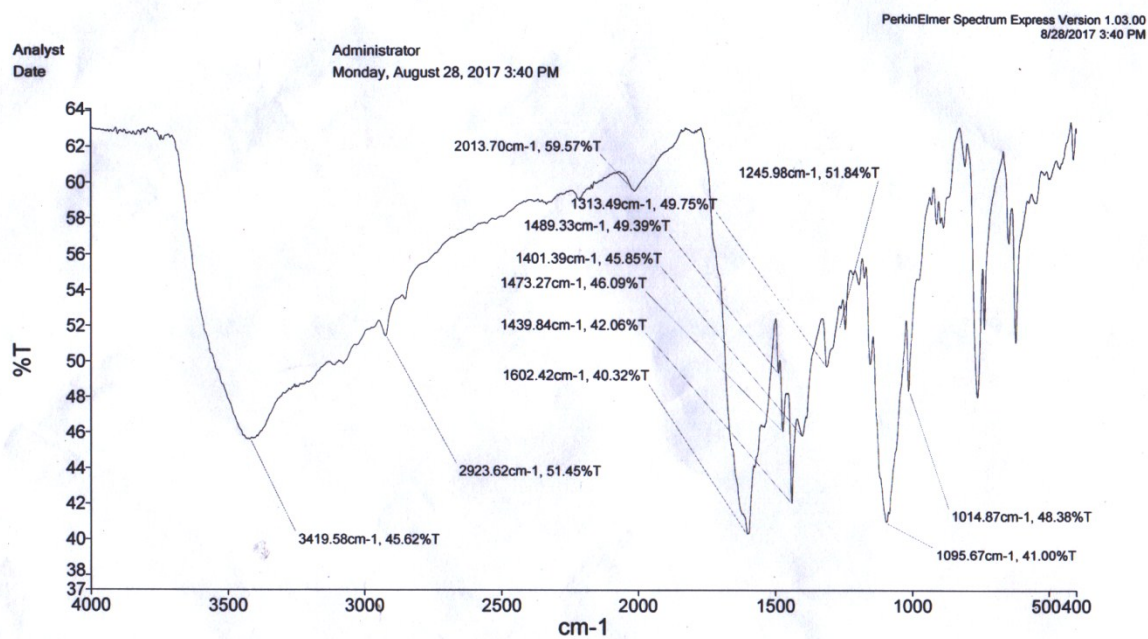

Fig. S3 Representative IR spectrum of complex 1.

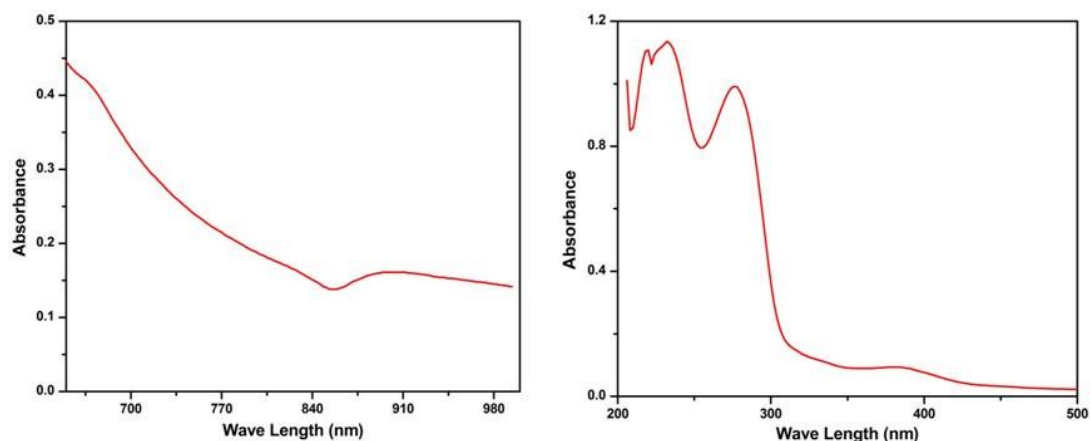

**Fig. S4** Representative UV-Vis spectra of the complex 1 in Methanol solution (left) d-d transition and (right) charge transfer band.

**Table S1** Representation of the d-d band and CT band in the complex 1

| Complex  | d-d band<br>$(\lambda_{\max}(\text{nm}) (\epsilon, \text{M}^{-1}\text{cm}^{-1}) \text{ in } \text{CH}_3\text{OH})$ | CT band<br>$(\lambda_{\max}(\text{nm}) (\epsilon, \text{M}^{-1}\text{cm}^{-1}) \text{ in } \text{CH}_3\text{OH})$ |
|----------|--------------------------------------------------------------------------------------------------------------------|-------------------------------------------------------------------------------------------------------------------|
| <b>1</b> | 895 (152)                                                                                                          | 383(9530),276(99000),232(113000),<br>219(110600)                                                                  |

**Table S2** Bond valence sum (BVS)<sup>a</sup> calculations for complex 1.

| Atom         | Mn <sup>II</sup> | Mn <sup>III</sup> |
|--------------|------------------|-------------------|
| <b>Mn(1)</b> | 3.39             | <u>3.21</u>       |
| <b>Mn(2)</b> | <u>2.06</u>      | 1.96              |

<sup>a</sup> The underlined value is the one closest to the charge for which it was calculated. The oxidation state is the nearest whole number to the underlined value.

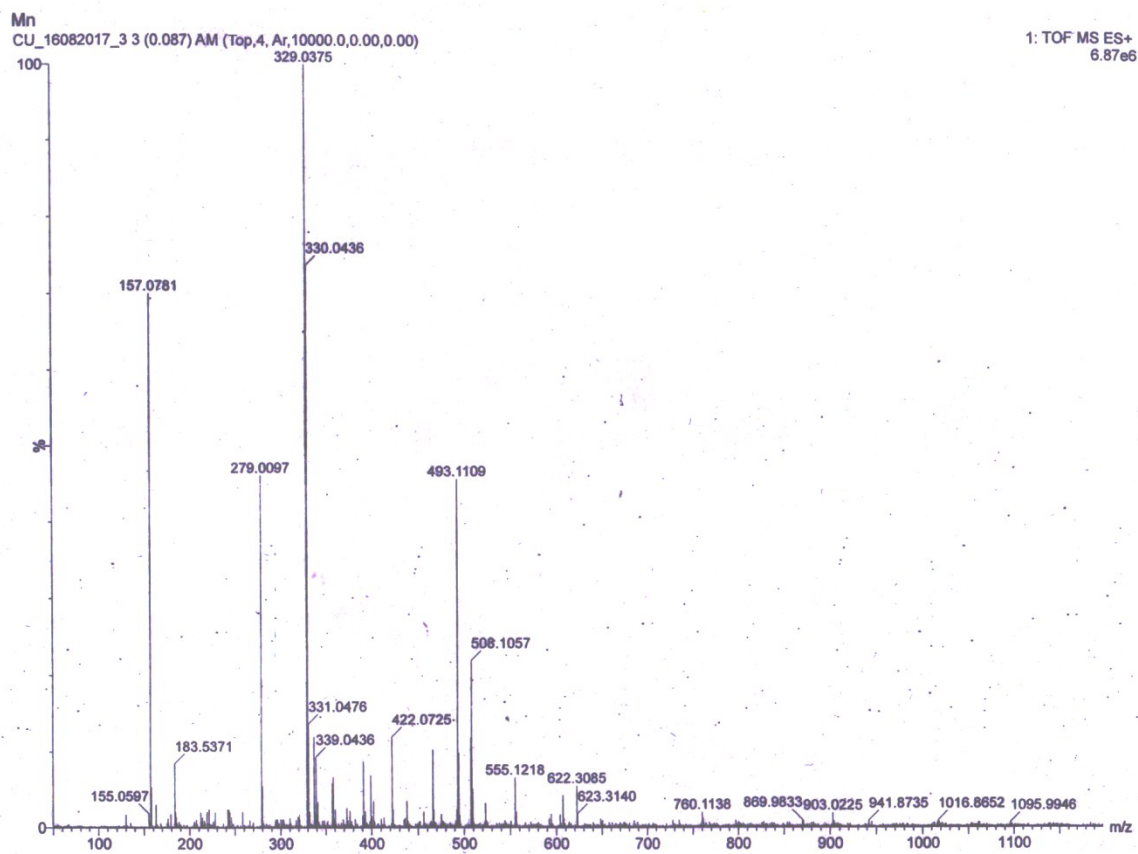

**Fig. S5** Representative ESI mass spectrum of complex **1**.

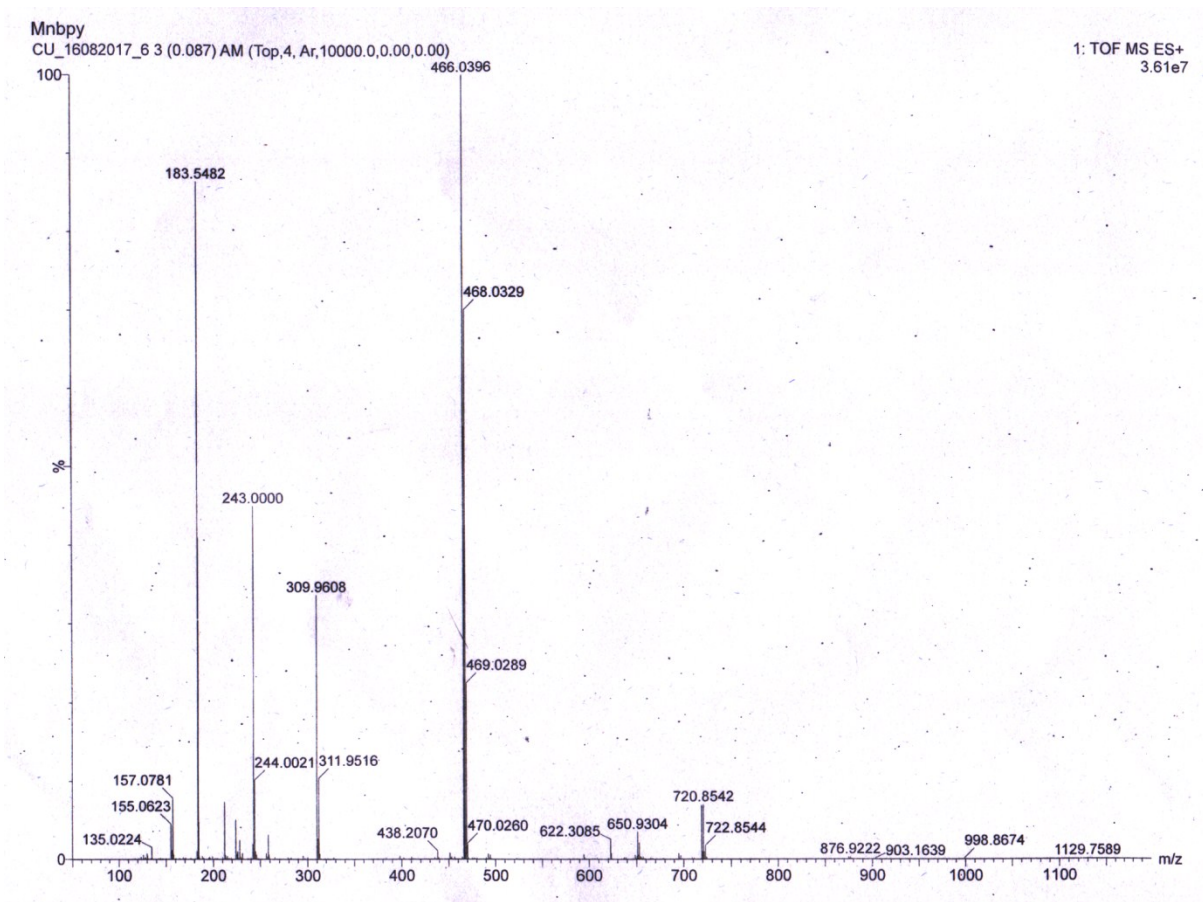

**Fig. S6** Representative ESI mass spectrum of the complex  $[\text{Mn}^{\text{II}}(\text{bpy})_2(\text{H}_2\text{O})(\text{ClO}_4)](\text{ClO}_4)$ .

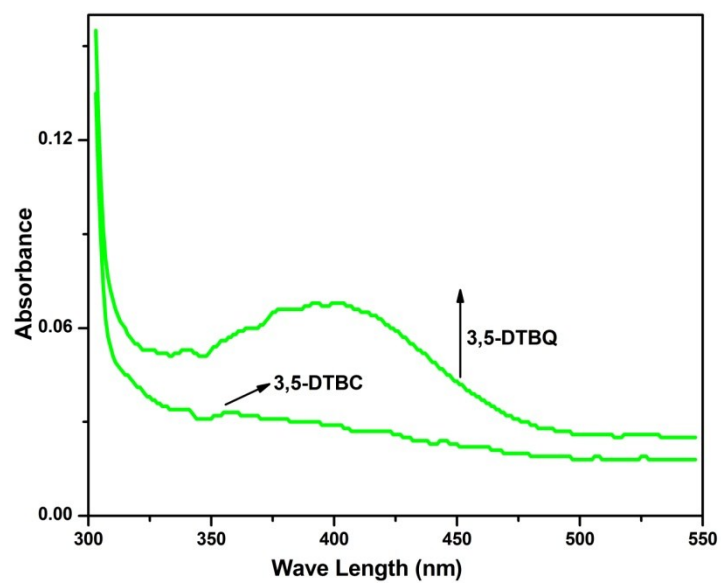

**Fig. S7** Representative UV-Vis spectra of 3,5-DTBC (Blank).

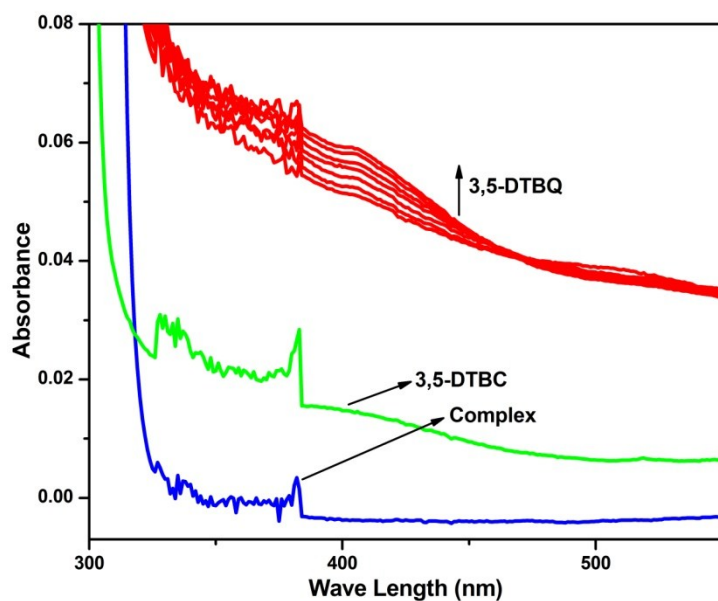

**Fig. S8** Representative UV-Vis spectra of the complex  $[\text{Mn}^{\text{II}}(\text{bpy})_2(\text{H}_2\text{O})(\text{ClO}_4)](\text{ClO}_4)$  with 3,5-DTBC.

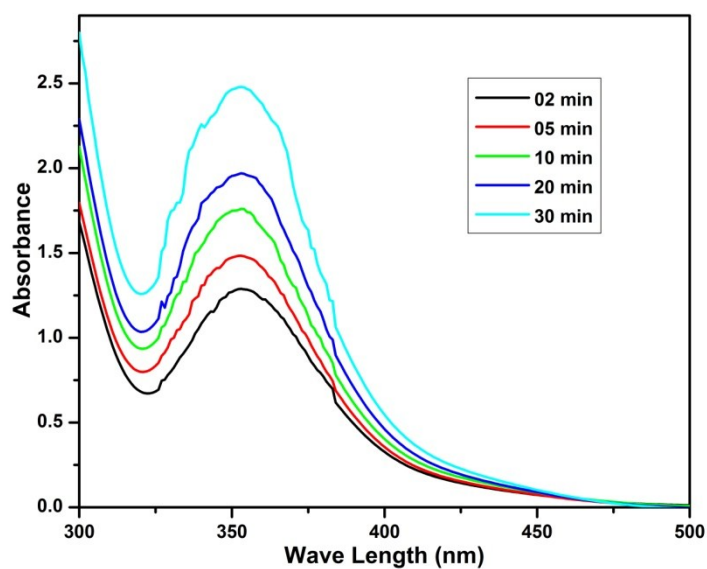

**Fig. S9** Increase of the absorption band at around 353 nm during the estimation of  $\text{H}_2\text{O}_2$  iodometrically. The spectra were recorded at different time interval

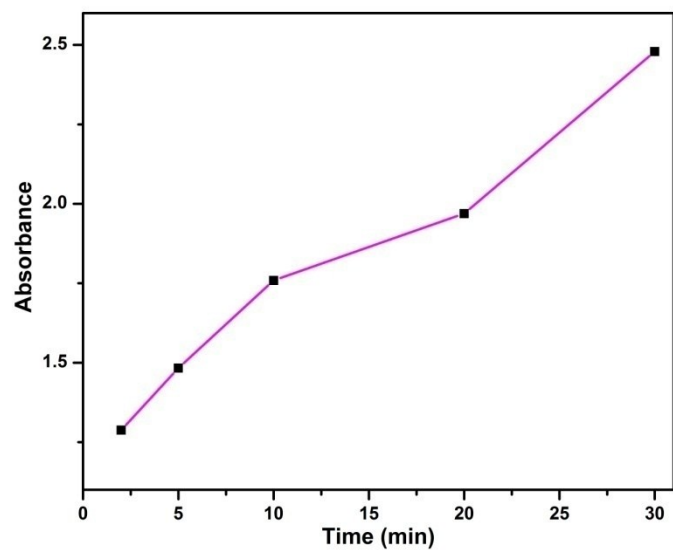

**Fig. S10** Plot of absorption maxima at around 353 nm with different time (min)

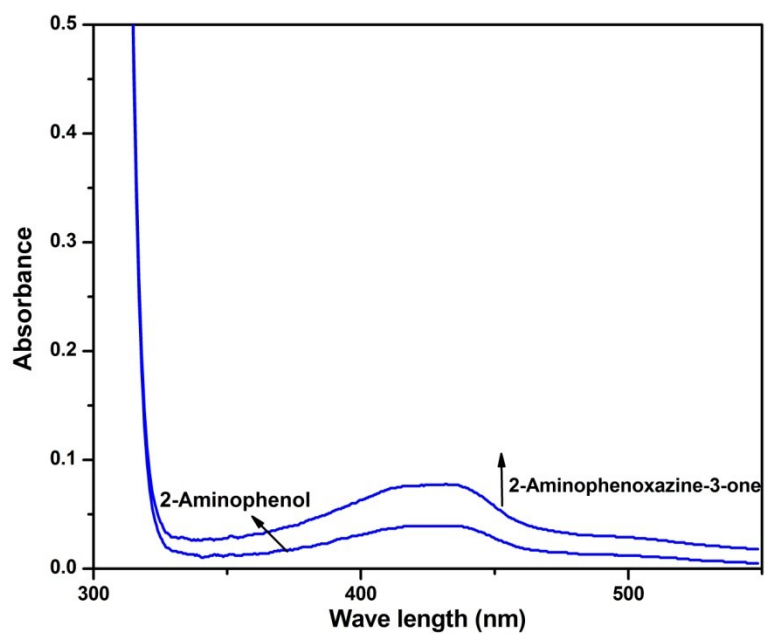

**Fig. S11** Representative UV-Vis spectra of OAPH (Blank).

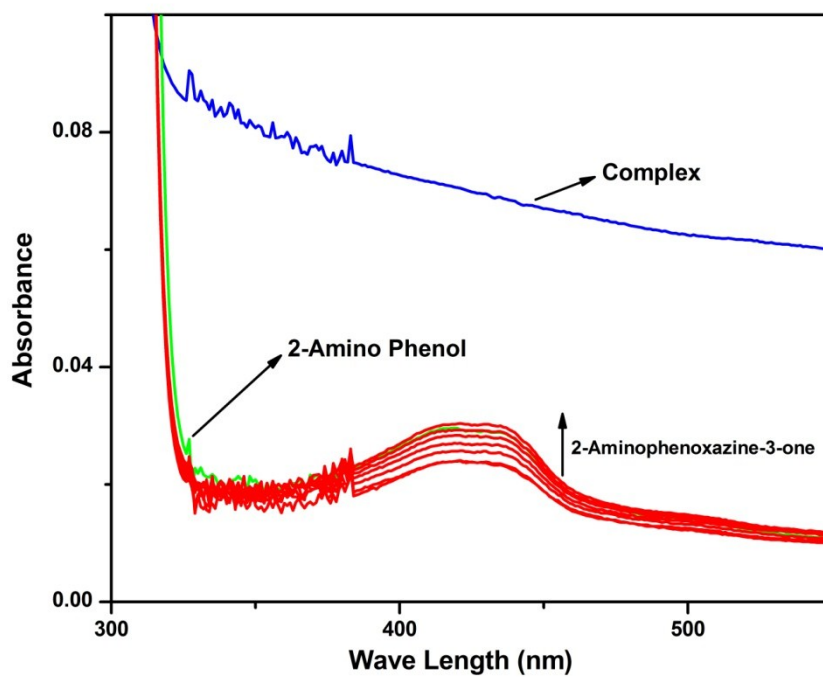

**Fig. S12** Representative UV-Vis spectra of the complex  $[\text{Mn}^{\text{II}}(\text{bpy})_2(\text{H}_2\text{O})(\text{ClO}_4)](\text{ClO}_4)$  with OAPH.

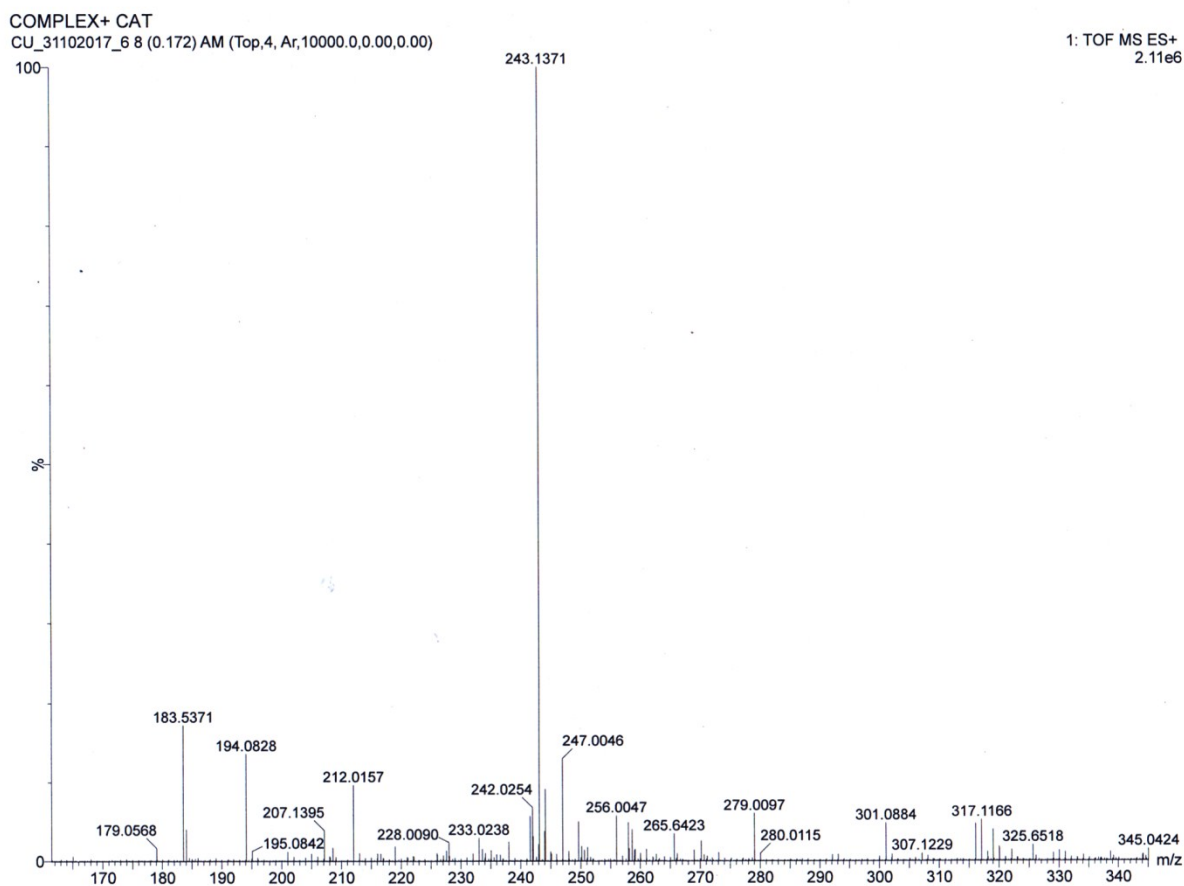

**Fig. S13** Representative ESI mass spectrum of complex **1** with 3,5-DTBC.



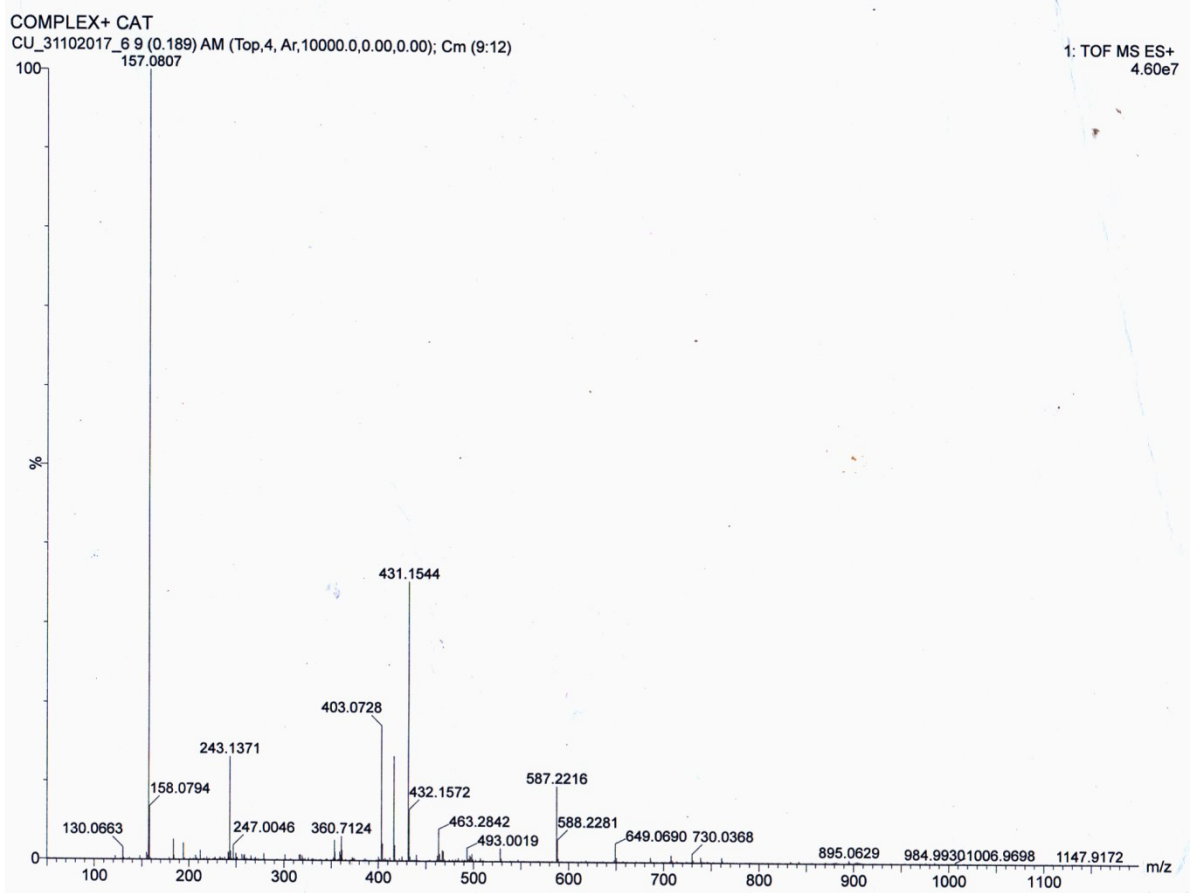

**Fig. S14** Representative ESI mass spectrum of complex **1** with 3,5-DTBC.

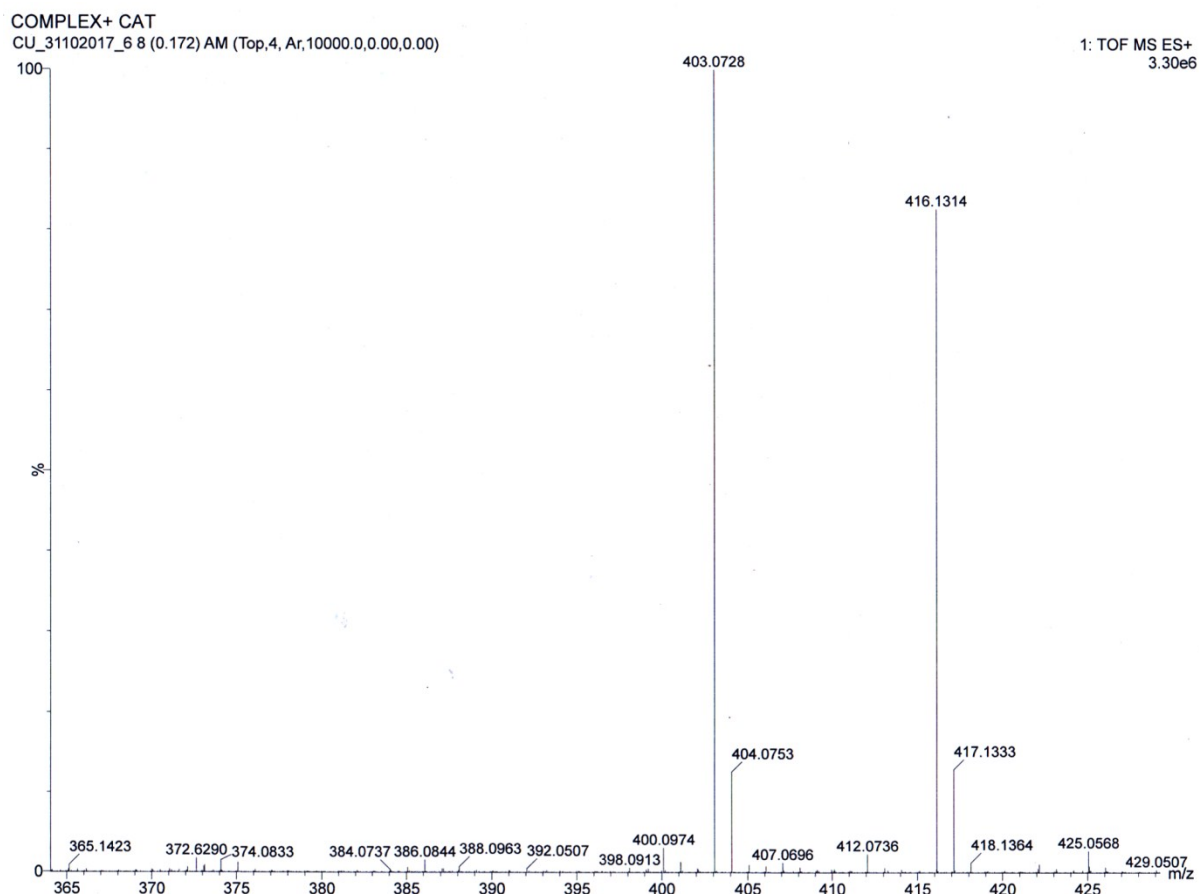

**Fig. S15** Representative ESI mass spectrum of complex **1** with 3,5-DTBC.

**Table S3** Kinetic parameters for the oxidation of 3,5-DTBC to 3,5-DTBQ catalyzed by different manganese complexes<sup>b</sup>

|                                  | Complexes                                                                                                                 | $k_{\text{cat}}$ (h <sup>-1</sup> ) in CH <sub>3</sub> OH | $k_{\text{cat}}$ (h <sup>-1</sup> ) in CH <sub>3</sub> CN | $k_{\text{cat}}$ (h <sup>-1</sup> ) in DMF | References |
|----------------------------------|---------------------------------------------------------------------------------------------------------------------------|-----------------------------------------------------------|-----------------------------------------------------------|--------------------------------------------|------------|
| <b>Mn<sup>II</sup> complexes</b> | [Mn <sup>II</sup> (HL <sup>1</sup> )(H <sub>2</sub> O) <sub>2</sub> (CH <sub>3</sub> CN)](ClO <sub>4</sub> ) <sub>2</sub> | Not performed                                             | Not performed                                             | 48.8                                       | 34a        |
|                                  | [Mn <sup>II</sup> (L <sup>2</sup> ) <sub>2</sub> (OH <sub>2</sub> ) <sub>2</sub> ]                                        | 598.0                                                     | Not performed                                             | Not performed                              | 34b        |
|                                  | [Mn <sup>II</sup> (HL <sup>3</sup> ) <sub>2</sub> ]·2ClO <sub>4</sub>                                                     | 1038.0                                                    | Not performed                                             | Not performed                              | 33c        |
|                                  | [Mn <sup>II</sup> (HL <sup>3</sup> )(N(CN) <sub>2</sub> )                                                                 | 871.2                                                     | Not performed                                             | Not performed                              | 33c        |
|                                  | [Mn <sup>II</sup> (HL <sup>3</sup> )(SCN) <sub>2</sub> ]                                                                  | 604.0                                                     | Not performed                                             | Not performed                              | 33c        |

|                                                                                                                                                                                               |                                                                                                                              |               |               |               |     |
|-----------------------------------------------------------------------------------------------------------------------------------------------------------------------------------------------|------------------------------------------------------------------------------------------------------------------------------|---------------|---------------|---------------|-----|
|                                                                                                                                                                                               | $[\text{Mn}^{\text{II}}(\text{o}-(\text{NO}_2)\text{C}_6\text{H}_4\text{COO})_2(\text{L}^4)(\text{H}_2\text{O})]_n$          | Not performed | 177           | Not performed | 9b  |
| <b>Mn<sup>III</sup> complexes</b>                                                                                                                                                             | $[\text{4-MePyH}][\text{Mn}^{\text{III}}(\text{L}^5)_2(\text{4-MePy})]$                                                      | Not performed | Not performed | 19.5          | 34c |
|                                                                                                                                                                                               | $[\text{4-EtPyH}][\text{Mn}^{\text{III}}(\text{L}^5)_2(\text{4-EtPy})]$                                                      | Not performed | Not performed | 25.9          | 34c |
|                                                                                                                                                                                               | $[\text{Et}_3\text{NH}][\text{Mn}^{\text{III}}(\text{L}^5)_2(\text{4-CNPy})_2] \cdot \text{H}_2\text{O}$                     | Not performed | Not performed | 36.0          | 34c |
|                                                                                                                                                                                               | $[\text{Et}_3\text{NH}][\text{Mn}^{\text{III}}(\text{L}^5)_2(\text{3-CNPy})_2] \cdot \text{3-CNPy} \cdot \text{H}_2\text{O}$ | Not performed | Not performed | 31.1          | 34c |
|                                                                                                                                                                                               | $[(\text{4-OHpy})_2\text{H}][\text{Mn}^{\text{III}}(\text{L}^5)_2(\text{MeOH})_2]$                                           | Not performed | Not performed | 40.5          | 34c |
|                                                                                                                                                                                               | $[\text{Mn}^{\text{III}}(\text{HL}^6)_2(\text{CH}_3\text{OH})_2][\text{Mn}^{\text{III}}(\text{HL}^6)_2(\text{N}_3)_2]$       | Not performed | 292.4         | Not performed | 34d |
|                                                                                                                                                                                               | $[\text{Mn}^{\text{III}}\text{L}^7\text{Cl} \cdot 4\text{H}_2\text{O}]$                                                      | -             | 1790.0        | -             | 34e |
|                                                                                                                                                                                               | $[\text{Mn}^{\text{III}}\text{L}^8\text{Cl} \cdot 4\text{H}_2\text{O}]$                                                      | 2470.0        | 3600.0        | -             | 34e |
|                                                                                                                                                                                               | $[\text{Mn}^{\text{III}}\text{L}^9\text{Cl} \cdot 4\text{H}_2\text{O}]$                                                      | 3600.0        | 1080.0        | -             | 34e |
|                                                                                                                                                                                               | $[\text{Mn}^{\text{III}}\text{L}^{10}\text{Cl} \cdot 4\text{H}_2\text{O}]$                                                   | 7200.0        | 1800.0        | -             | 34e |
|                                                                                                                                                                                               | $[\text{Mn}^{\text{III}}(\text{L}^{11})(\text{OAc})(\text{OCH}_3)](\text{PF}_6)$                                             | 86.0          | Not performed | Not performed | 34f |
|                                                                                                                                                                                               | $[\text{Mn}^{\text{III}}(\text{L}^{12})(\text{OAc})(\text{OCH}_3)](\text{PF}_6)$                                             | 101.0         | Not performed | Not performed | 34f |
|                                                                                                                                                                                               | $[\text{Mn}^{\text{III}}(\text{L}^{12})(\text{Cl})_2](\text{ClO}_4)$                                                         | 230.0         | Not performed | Not performed | 34f |
|                                                                                                                                                                                               | $[\text{Mn}^{\text{III}}(\text{HL}^{13})(\text{Cl})_2] \cdot \text{CH}_3\text{OH}$                                           | 130.0         | Not performed | Not performed | 34f |
| $[\text{Mn}^{\text{III}}_6(\mu_4\text{-H}_2\text{L}^{14})_2(\mu\text{-HL}^{15})_2(\mu_3\text{-OH})_2(\mu_{1,3}\text{-O}_2\text{CC}_2\text{H}_5)_4](\text{ClO}_4)_2 \cdot 2\text{H}_2\text{O}$ | 54.0                                                                                                                         | Not performed | Not performed | 34g           |     |
| <b>Mn<sup>IV</sup> complexes</b>                                                                                                                                                              | $[\text{Mn}^{\text{IV}}(\text{L}^{16})_2](\text{ClO}_4)_2 \cdot 0.88\text{H}_2\text{O}$                                      | Not performed | 136.0         | Not performed | 33e |
|                                                                                                                                                                                               | $[\text{Mn}^{\text{IV}}(\text{HL}^{16})_2(\text{N}_3)_2](\text{ClO}_4)_2 \cdot 2\text{H}_2\text{O}$                          | Not           | 398.7         | Not           | 33e |

|                                                    |                                                                                                                                                                                                                                                                  |               |               |               |       |
|----------------------------------------------------|------------------------------------------------------------------------------------------------------------------------------------------------------------------------------------------------------------------------------------------------------------------|---------------|---------------|---------------|-------|
|                                                    |                                                                                                                                                                                                                                                                  | performed     |               | performed     |       |
|                                                    | $[\{\text{Mn}^{\text{IV}}(\text{L}^{17})(\mu\text{-O})\}_2][\text{ClO}_4]_2 \cdot 2\text{CH}_3\text{CN} \cdot \text{CH}_3\text{OH}$                                                                                                                              | Not performed | 8690.0        | Not performed | 34h   |
| <b>Mixed valence Mn<sup>II/III</sup> complexes</b> | $[\text{Mn}^{\text{III}}_2 \text{Mn}^{\text{II}}(\mu\text{-H}_2\text{L}^{18})_2(\mu_{1,3}\text{-O}_2\text{CCH}_3)_4(\text{CH}_3\text{OH})_2](\text{ClO}_4)_2 \cdot 4\text{C}_6\text{H}_5\text{OH}$                                                               | 61.0          | Not performed | Not performed | 34g   |
|                                                    | $[\text{Mn}^{\text{III}}_2 \text{Mn}^{\text{II}}(\text{O}_2\text{CMe})_4(\text{L}^{19})_2(\text{H}_2\text{O})_2] \cdot 2\text{H}_2\text{O}$                                                                                                                      | Not performed | 8220.0        | Not performed | 33g   |
|                                                    | $[\text{Mn}^{\text{III}}_2 \text{Mn}^{\text{II}}(\text{O}_2\text{CCH}_2\text{Cl})_4(\text{L}^{19})_2(\text{H}_2\text{O})_2] \cdot \text{H}_2\text{O} \cdot \text{CH}_3\text{OH}$                                                                                 | Not performed | 9011.0        | Not performed | 33g   |
|                                                    | $[\text{Mn}^{\text{II}}(\text{L}^{20})\text{Cl}][\text{Mn}^{\text{III}}(\text{L}^5)_2(\text{H}_2\text{O})_2] \cdot 4\text{H}_2\text{O}$                                                                                                                          | Not performed | Not performed | 28.9          | 34i   |
|                                                    | $[\text{Mn}^{\text{III}}\text{Mn}^{\text{II}}\text{L}^{21}(\mu\text{-O}_2\text{CMe})(\text{H}_2\text{O})_2](\text{ClO}_4)_2 \cdot \text{H}_2\text{O} \cdot \text{CH}_3\text{CN}$                                                                                 | 11.6          | 20.6          | Not performed | 34j   |
|                                                    | $[\text{Mn}^{\text{III}}\text{Mn}^{\text{II}}\text{L}^{21}(\mu\text{-O}_2\text{CPh})(\text{CH}_3\text{OH})(\text{ClO}_4)](\text{ClO}_4)$                                                                                                                         | 7.5           | 15.6          | Not performed | 34j   |
|                                                    | $[\{\text{Mn}^{\text{III}}\text{Mn}^{\text{II}}\text{L}^{21}(\mu\text{-O}_2\text{CEt})(\text{EtOH})\}_2(\mu\text{-O}_2\text{CEt})](\text{ClO}_4)_3$                                                                                                              | 44.6          | 64.7          | Not performed | 34j   |
|                                                    | $[\text{Mn}^{\text{III}}_2\text{Mn}^{\text{II}}_4\text{O}_2(\text{hmt})_4(\text{OCOC}_6\text{H}_5)_{10}]$                                                                                                                                                        | Not performed | 2337.9        | Not performed | 34k   |
|                                                    | $[\text{Mn}^{\text{III}}_2\text{Mn}^{\text{II}}_4\text{O}_2(\text{pyz})_{0.61}/(\text{MeOH})_{0.39}(\text{o}-(\text{NO}_2)\text{-C}_6\text{H}_4\text{COO})_{10} \cdot (\text{H}_2\text{O}) \cdot \{(\text{CH}_3)_2\text{CO}\}_2] \cdot (\text{CH}_3)_2\text{CO}$ | Not performed | 432.0         | Not performed | 9b    |
|                                                    | $[\text{Mn}^{\text{III}}_2\text{Mn}^{\text{II}}_4\text{O}_2(\text{pyz})_{0.28}/(\text{MeCN})_{3.72}(\text{o}-(\text{NO}_2)\text{-C}_6\text{H}_4\text{COO})_{10} \cdot (\text{H}_2\text{O})]$                                                                     | Not performed | 426.0         | Not performed | 9b    |
| <b>Mixed valence Mn<sup>II/III</sup></b>           | $[\text{Mn}^{\text{III}}_2\text{Mn}^{\text{II}}_4\text{O}_2(\text{pyz})_2(\text{C}_6\text{H}_5\text{CH}_2\text{COO})_{10}]_n$                                                                                                                                    | Not performed | 2547.0        | Not performed | 9c    |
|                                                    | Complex 1                                                                                                                                                                                                                                                        | 126.9         | Not           | Not           | Prese |

| coordination polymer |  |  | performed | performed | nt Study |
|----------------------|--|--|-----------|-----------|----------|
|----------------------|--|--|-----------|-----------|----------|

<sup>b</sup> Where L<sup>1</sup> = 1,3-Bis(6'-methyl-2-pyridylimino)isoindoline, L<sup>2</sup> = 3-methoxy-4-hydroxy-benzaldehyde, HL<sup>3</sup> = 4-tert-butyl-2,6-bis-[(2-pyridin-2-yl-ethylimino)-methyl]-phenol, L<sup>4</sup> = Pyrazine, H<sub>2</sub>L<sup>5</sup> = tetrabromo catechol, H<sub>2</sub>L<sup>6</sup> = 1-(5-hydroxy-3-oxapentyliminomethyl)-3-ethoxyphenol, H<sub>2</sub>L<sup>7</sup> = N,N'-ethylenebis(3-formyl-5-methylsalicylaldimine), H<sub>2</sub>L<sup>8</sup> = N,N'-1,1-methylethylenebis(3-formyl-5-methylsalicylaldimine), H<sub>2</sub>L<sup>9</sup> = N,N'-1,1-dimethylethylenebis(3-formyl-5-methylsalicylaldimine), H<sub>2</sub>L<sup>10</sup> = N,N'-cyclohexenebis(3-formyl-5-methylsalicylaldimine), L<sup>11</sup> = bis(picoyl)(N-methylimidazole-2-yl)amine, L<sup>12</sup> = bis((1-methylimidazole-2-yl)methyl)((2-pyridyl)methyl)amine, L<sup>13</sup> = ((1-methylimidazole-2-yl)methyl)((2-pyridyl)methyl)-(2-hydroxyphenyl)amine, H<sub>3</sub>L<sup>14</sup> = 2,6-bis((1-hydroxy-2-(hydroxymethyl)butan-2-ylimino)-methyl)-4-methylphenol, H<sub>3</sub>L<sup>15</sup> = 3-(3,3-bis(hydroxymethyl)pent-1-enyl)-2-hydroxy-5-methylbenzaldehyde, HL<sup>16</sup> = 2-[(3-(dimethylamino)propylimino)methyl]-4-bromophenol, HL<sup>17</sup> = 2-benzyl-6-((bis(pyridin-2-ylmethyl)amino)methyl)-4-chlorophenol, H<sub>3</sub>L<sup>18</sup> = 2,6-bis((1-hydroxy-2-methylpropan-2-ylimino)-methyl)-4-methylphenol, H<sub>2</sub>L<sup>19</sup> = 2-[(2-Hydroxy-1,1-dimethyl-ethylimino)-methyl]-phenol, L<sup>20</sup> = tris(2-benzimidazolylmethyl)amine, H<sub>2</sub>L<sup>21</sup> = [2 + 2] condensation product of 2,6-diformyl-4-methylphenol and 2,2-dimethyl-1,3-diaminopropane, hmt = hexamethylenetetramine.

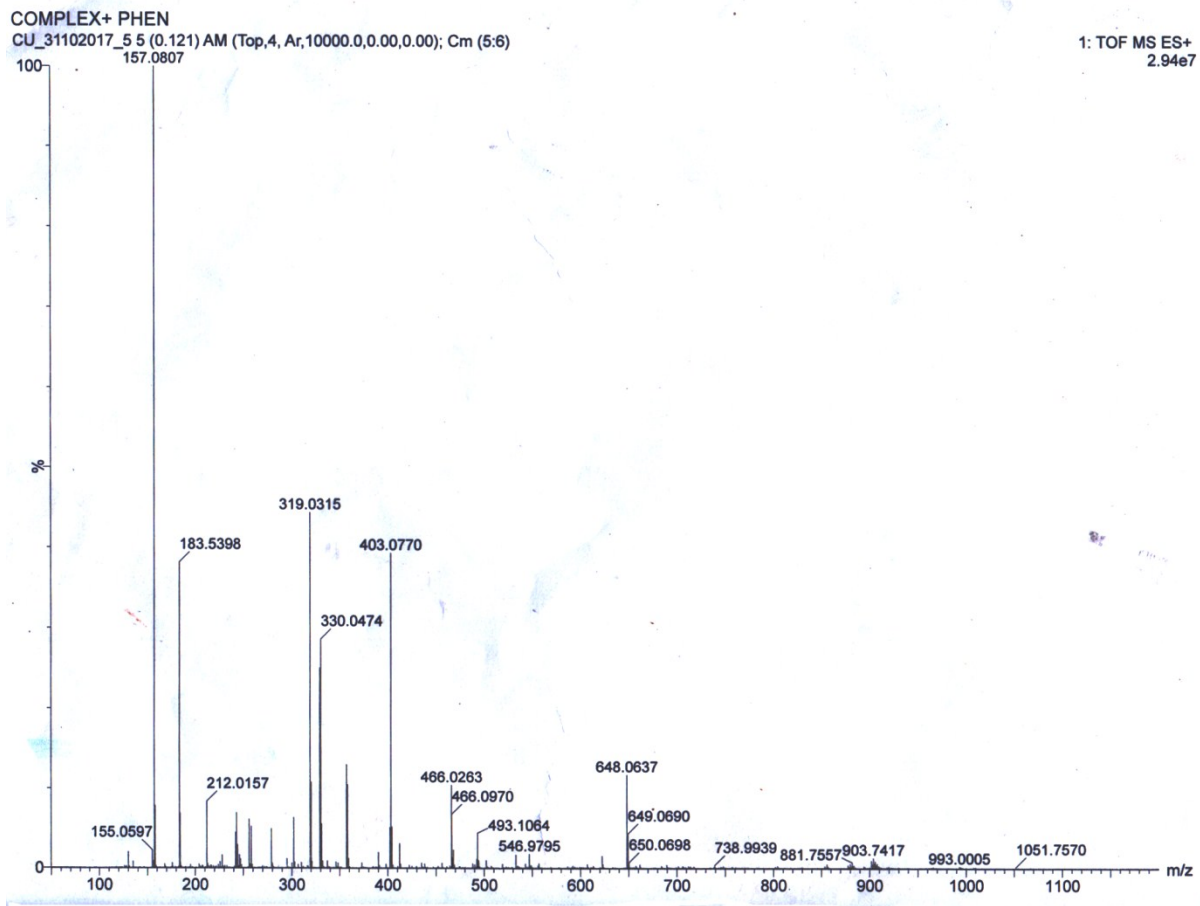

**Fig. S16** Representative ESI mass spectrum of complex **1** with OAPH.

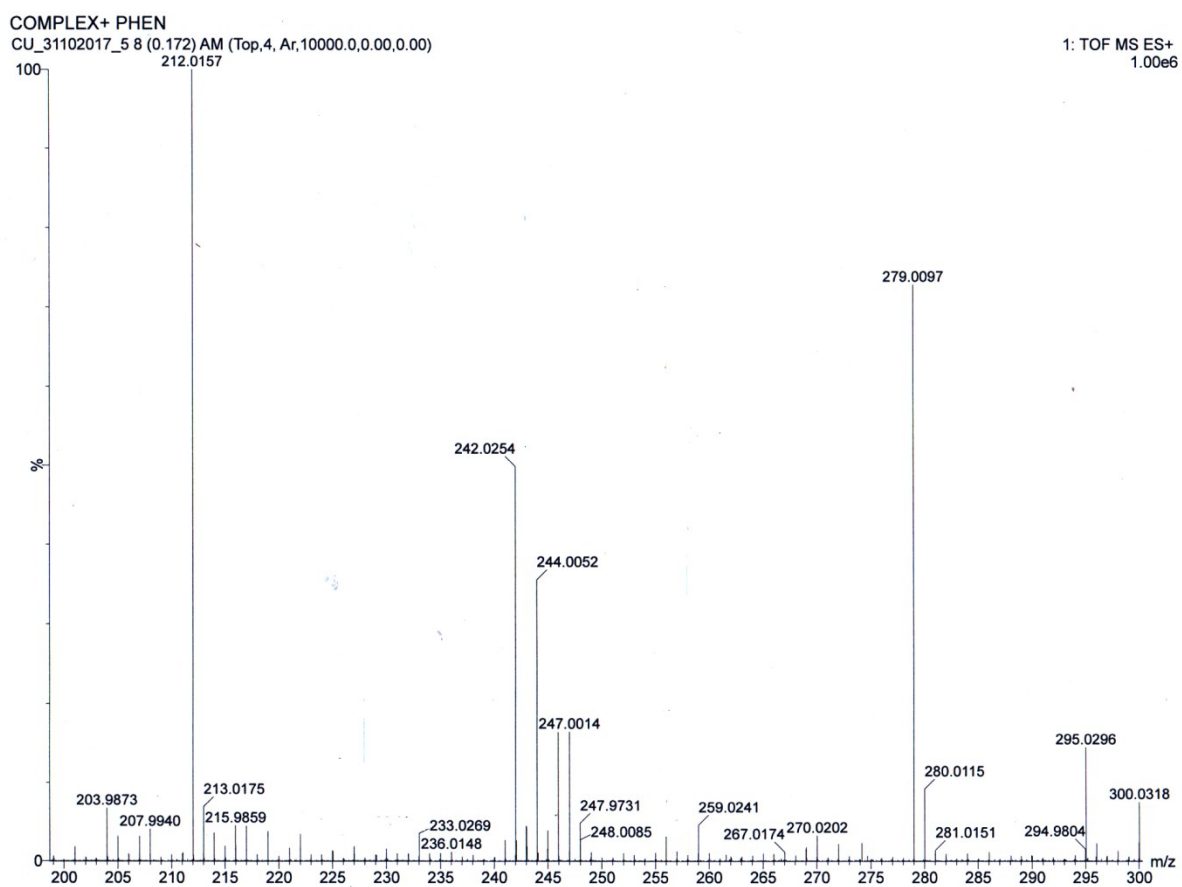

**Fig. S17** Representative ESI mass spectrum of complex **1** with OAPH.

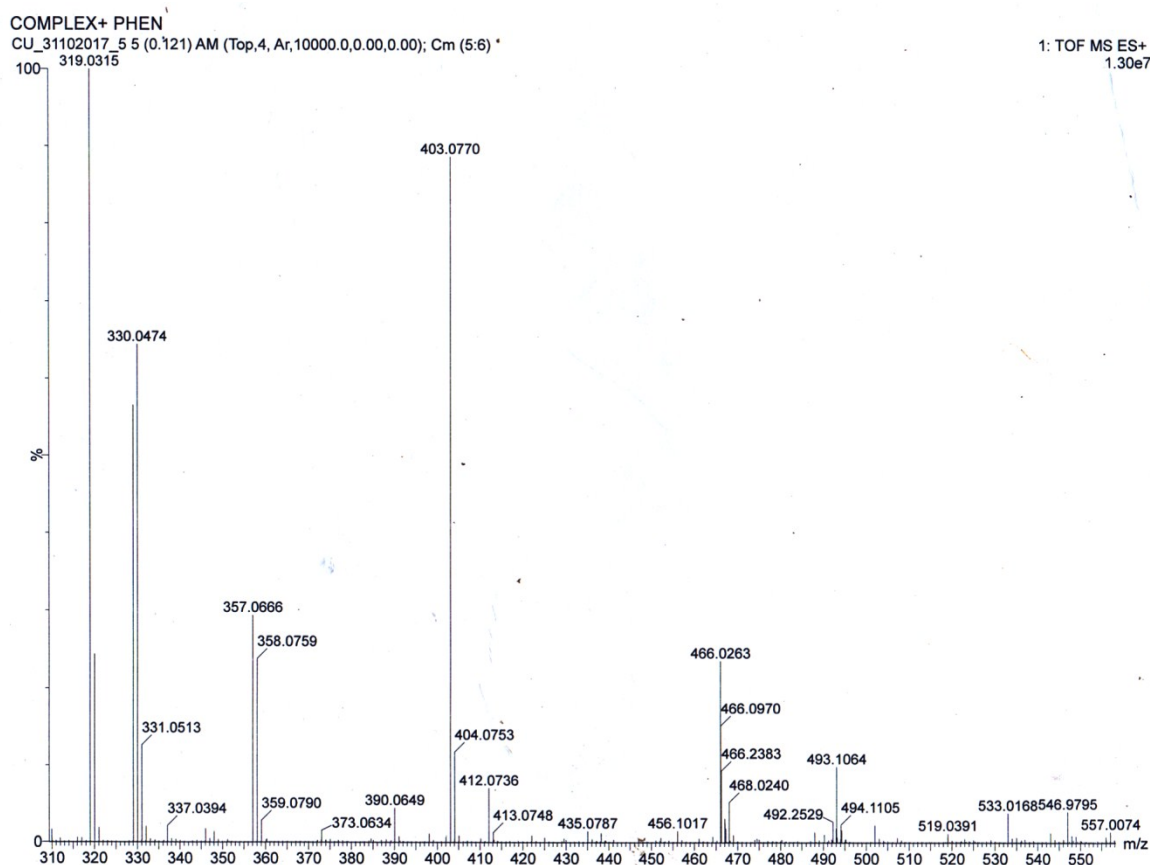

**Fig. S18** Representative ESI mass spectrum of complex **1** with OAPH.

**Table S4.**  $k_{\text{cat}}$  Values for the oxidation of OAPH to 2-aminophenoxazine-3-one catalyzed by complex **1** and other reported Manganese complexes.<sup>c</sup>

|                                  | Complexes                                                                                          | $k_{\text{cat}}$ ( $\text{h}^{-1}$ ) in $\text{CH}_3\text{OH}$ | $k_{\text{cat}}$ ( $\text{h}^{-1}$ ) in $\text{CH}_3\text{CN}$ | $k_{\text{cat}}$ ( $\text{h}^{-1}$ ) in DMF | References |
|----------------------------------|----------------------------------------------------------------------------------------------------|----------------------------------------------------------------|----------------------------------------------------------------|---------------------------------------------|------------|
| <b>Mn<sup>II</sup> complexes</b> | $[\text{Mn}^{\text{II}}(\text{HL}^1)(\text{H}_2\text{O})_2(\text{CH}_3\text{CN})](\text{ClO}_4)_2$ | Not performed                                                  | Not performed                                                  | 2.916                                       | 34a        |
|                                  | $[\text{Mn}^{\text{II}}(\text{L}^2)\text{Cl}_2]$                                                   | 11.90                                                          | Not performed                                                  | Not performed                               | 35a        |
|                                  | $[\text{Mn}^{\text{II}}(\text{L}^3)\text{Cl}_2]$                                                   | 9.66                                                           | Not performed                                                  | Not performed                               | 35a        |
|                                  | $[\text{Mn}^{\text{II}}(\text{L}^4)\text{Cl}_2]$                                                   | 8.32                                                           | Not performed                                                  | Not performed                               | 35a        |
|                                  | $[\text{Mn}^{\text{II}}(\text{L}^5)\text{Cl}_2]$                                                   | 26.32                                                          | Not performed                                                  | Not performed                               | 35a        |



|                                                    |                                                                                                                              |               |               |               |               |
|----------------------------------------------------|------------------------------------------------------------------------------------------------------------------------------|---------------|---------------|---------------|---------------|
|                                                    | $[\text{Mn}^{\text{II}}(\text{L}^6)_2(\text{OH}_2)_2]$                                                                       | 315           | Not performed | Not performed | 35a           |
|                                                    | $[\text{Mn}^{\text{II}}(\text{HL}^7)_2] \cdot 2\text{ClO}_4$                                                                 | 138.62        | Not performed | Not performed | 33c           |
|                                                    | $[\text{Mn}^{\text{II}}(\text{HL}^7)(\text{N}(\text{CN})_2)$                                                                 | 64.07         | Not performed | Not performed | 33c           |
|                                                    | $[\text{Mn}^{\text{II}}(\text{HL}^7)(\text{SCN})_2]$                                                                         | 14.2          | Not performed | Not performed | 33c           |
| <b>Mn<sup>III</sup> complexes</b>                  | $[\text{Mn}^{\text{III}}(\text{L}^8)_2]\text{ClO}_4$                                                                         | Not performed | 60            | Not performed | 35b           |
|                                                    | $[\text{Mn}^{\text{III}}(\text{L}^9)(\text{NCS})(\text{H}_2\text{O})] \cdot \text{DMSO}$                                     | Not performed | 308.13        | Not performed | 35b           |
|                                                    | $[\text{Mn}^{\text{III}}(\text{L}^{10})\text{Cl}(\text{H}_2\text{O})] \cdot \text{H}_2\text{O}$                              | 35.24         | Not performed | Not performed | 35c           |
|                                                    | $[\text{Mn}^{\text{III}}(\text{HL}^{11})_2(\text{CH}_3\text{OH})_2][\text{Mn}^{\text{III}}(\text{HL}^{10})_2(\text{N}_3)_2]$ | Not performed | 215.58        | Not performed | 34d           |
| <b>Mn<sup>IV</sup> complexes</b>                   | $[\text{Mn}^{\text{IV}}(\text{L}^{12})_2](\text{ClO}_4)_2 \cdot 0.88\text{H}_2\text{O}$                                      | Not performed | 65.82         | Not performed | 35d           |
|                                                    | $[\text{Mn}^{\text{IV}}(\text{HL}^{12})_2(\text{N}_3)_2](\text{ClO}_4)_2 \cdot 2\text{H}_2\text{O}$                          | Not performed | 68.46         | Not performed | 35d           |
|                                                    | $[\text{Mn}^{\text{IV}}(\text{HL}^{13})(\text{L}^{12})(\text{NCS})]_n$                                                       | Not performed | 280.4         | Not performed | 33f           |
|                                                    | $[\text{Mn}^{\text{IV}}(\text{HL}^{14})_2(\text{OH})\text{Cl}]$                                                              | Not performed | 166.2         | Not performed | 33f           |
| <b>Mixed valence Mn<sup>II/III</sup> complexes</b> | Complex 1                                                                                                                    | 738           | Not performed | Not performed | Present Study |

<sup>c</sup> Where  $\text{L}^1 = 1,3\text{-Bis}(6'\text{-methyl-2-pyridylimino})\text{isoindoline}$ ,  $\text{L}^2 = 2\text{-(tetrahydro-2-(pyridin-2-yl)pyrimidin-1(2H)-yl)-N-((pyridin-2-yl)methylene)ethanamine}$ ,  $\text{L}^3 = \text{N-(methoxy(pyridin-2-yl)methyl)-2-(2-(pyridin-2-yl)imidazolidin-1-yl)ethanamine}$ ,  $\text{L}^4 = 2\text{-(2-(6-methylpyridin-2-yl)imidazolidin-1-yl)-N-((6-methylpyridin-2-yl)methylene)ethanamine}$ ,  $\text{L}^5 = \text{hexahydro-1-(2-(tetrahydro-2-(pyridin-2-yl)pyrimidin-1(2H)-yl)ethyl)-2-(pyridin-2-yl)pyrimidine}$ ,  $\text{L}^6 = 3\text{-}$

methoxy-4-hydroxy-benzaldehyde, HL<sup>7</sup> = 4-tert-butyl-2,6-bis-[(2-pyridin-2-yl-ethylimino)-methyl]-phenol, HL<sup>8</sup> = 3-(N,N-dimethylamino)propyliminomethyl-6-ethoxyphenol, H<sub>2</sub>L<sup>9</sup> = N,N'-bis(3-ethoxysalicylidene)ethane-1,2-diamine, H<sub>2</sub>L<sup>10</sup> = (E)-6,6'-((1E,1'E)-(ethane-1,2-diylbis(azanylylidene))bis(methanylylidene))bis(2-methoxy-4-((E)-p-tolyldiazenyl)phenol)], H<sub>2</sub>L<sup>11</sup> = 1-(5-hydroxy-3-oxapentyliminomethyl)-3-ethoxyphenol, HL<sup>12</sup> = 2-[3-(dimethylamino)propylimino)methyl]-4-bromophenol, H<sub>2</sub>L<sup>13</sup> = 1-(5-hydroxy-3-oxapentyliminomethyl)-3-ethoxyphenol, H<sub>2</sub>L<sup>14</sup> = 1-(5-hydroxy-3-oxapentyliminomethyl)-4-chlorophenol.
